# Supplementary material for: Interface Modeling for the Ab Initio Evaluation of the Water Contact Angle on a Metallic Cu(111) Surface
Source: Research Square preprint supplement (doi:10.21203/rs.3.rs-706533/v1), 2021-07-15
Supplement: Supplementary file 1 [file a898080c5fa957c800606f6c.pdf]

# **Supporting Information for “Interface Modeling for the *Ab Initio* Evaluation of the Water Contact Angle on a Metallic Cu(111) Surface”**

Takahiro Muro<sup>1</sup>, Kenta Hongo<sup>2</sup>, Kousuke Nakano<sup>1,3</sup>, and Ryo Maezono<sup>1</sup>

<sup>1</sup> *School of Information Science, JAIST,*

*Asahidai 1-1, Nomi, Ishikawa, 923-1292, Japan*

<sup>2</sup> *Research Center for Advanced Computing Infrastructure,*

*JAIST, Asahidai 1-1, Nomi, Ishikawa 923-1292, Japan and*

<sup>3</sup> *International School for Advanced Studies (SISSA),*

*Via Bonomea 265, 34136 Trieste, Italy*

All the structures we used in the calculations are provided in xsf-format, as well as in figures shown below.

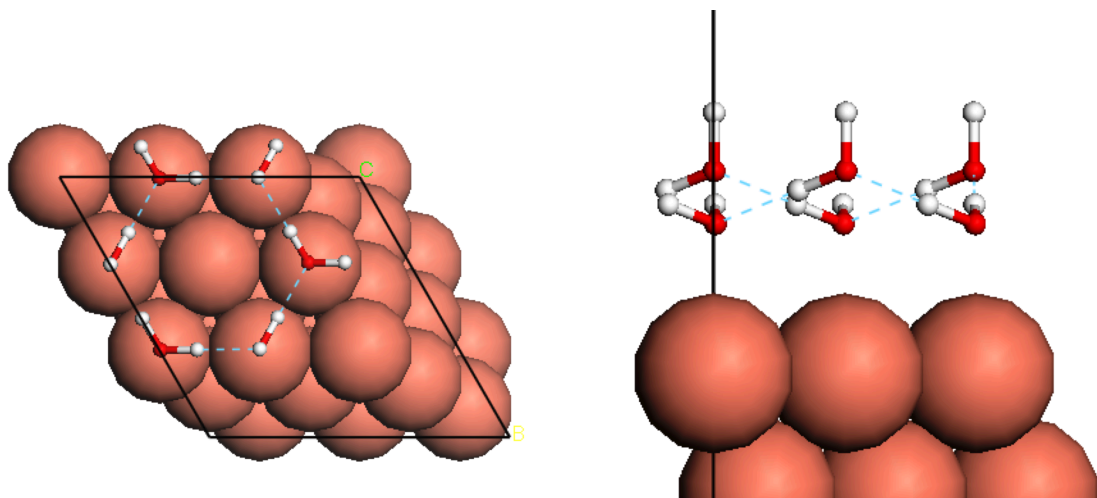

Figure S 1. Atomic geometry of the ice-like bilayer structure (left:topview, right:sideview). Cu atoms (bigger red balls) form a  $3 \times 3$  unitcell, on which six  $\text{H}_2\text{O}$  molecules are located with the on-top geometry.

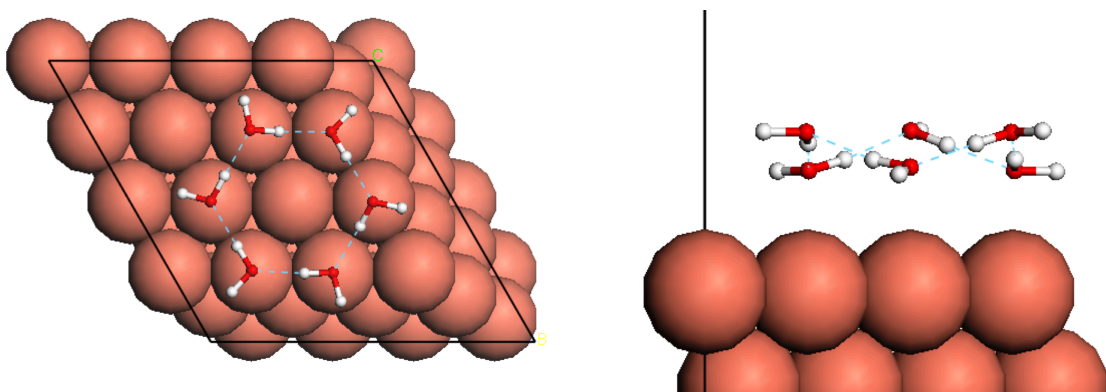

Figure S 2. Atomic geometry of the cyclic structure (buckled) for the water hexamer (left:topview, right:sideview). Cu atoms (bigger red balls) form a  $4 \times 4$  unitcell, on which six  $\text{H}_2\text{O}$  molecules are located with the on-top geometry. Adjacent molecules take the vertical height difference of each oxygen site being  $\sim 0.85 \text{ \AA}$ .

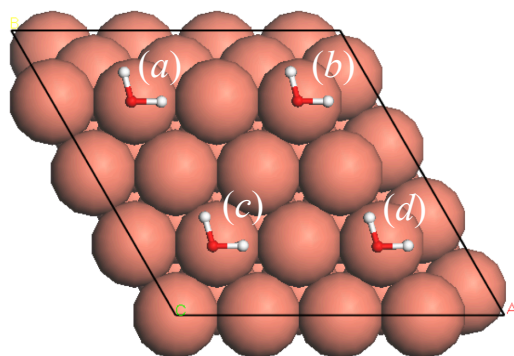

Figure S 3. Atomic geometry of the monomer adsorption model (topview) on Cu(111) surface (Cu atoms shown as bigger red balls).  $\text{H}_2\text{O}$  molecules are located with the on-top geometry. We considered four-molecule configuration (as shown in the picture), as well as three- [by putting molecules at (a),(b),(c)], two- [at (b),(c)], and one-molecule configuration [only at (c)], corresponding to the variation of coverage.

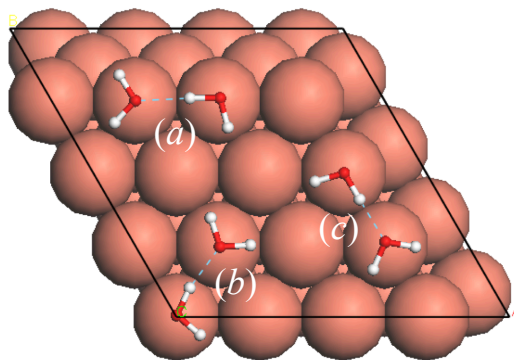

Figure S 4. Atomic geometry of the dimer adsorption model (topview) on Cu(111) surface (Cu atoms shown as bigger red balls).  $\text{H}_2\text{O}$  molecules are located with the on-top geometry. We considered three-cluster configuration (as shown in the picture), as well as two- [by putting clusters at (a),(b)], and one-cluster configuration [only at (b)], corresponding to the variation of coverage.

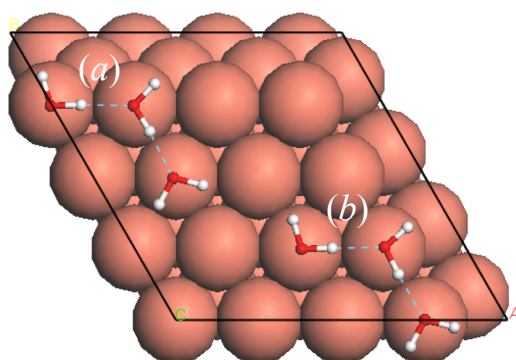

Figure S 5. Atomic geometry of the trimer (chain) adsorption model (topview) on Cu(111) surface (Cu atoms shown as bigger red balls).  $\text{H}_2\text{O}$  molecules are located with the on-top geometry. We considered two-cluster configuration (as shown in the picture), as well as one-cluster configuration [by putting the cluster only at (a)], corresponding to the variation of coverage.

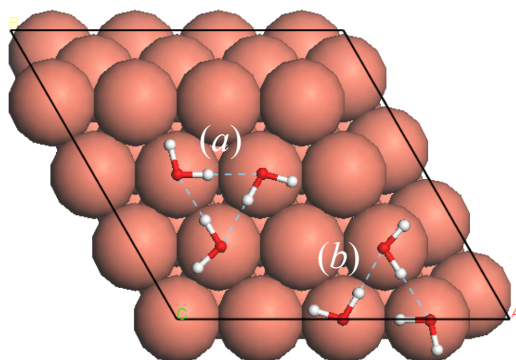

Figure S 6. Atomic geometry of the trimer (cyclic) adsorption model (topview) on Cu(111) surface (Cu atoms shown as bigger red balls).  $\text{H}_2\text{O}$  molecules are located with the on-top geometry. We considered two-cluster configuration (as shown in the picture), as well as one-cluster configuration [by putting the cluster only at (a)], corresponding to the variation of coverage.

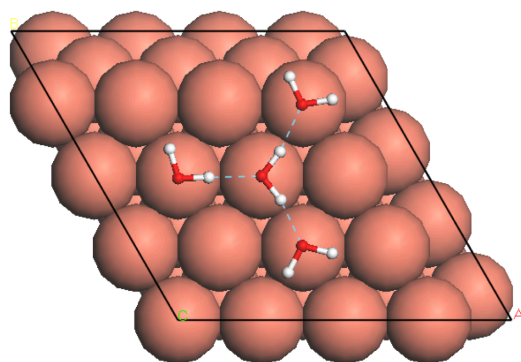

Figure S 7. Atomic geometry of the tetramer (chain) adsorption model (topview) on Cu(111) surface (Cu atoms shown as bigger red balls). H<sub>2</sub>O molecules are located with the on-top geometry.

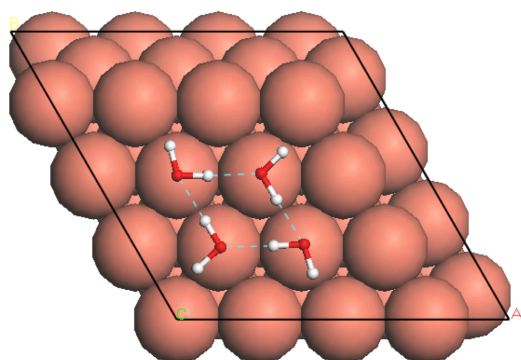

Figure S 8. Atomic geometry of the tetramer (cyclic) adsorption model (topview) on Cu(111) surface (Cu atoms shown as bigger red balls). H<sub>2</sub>O molecules are located with the on-top geometry.

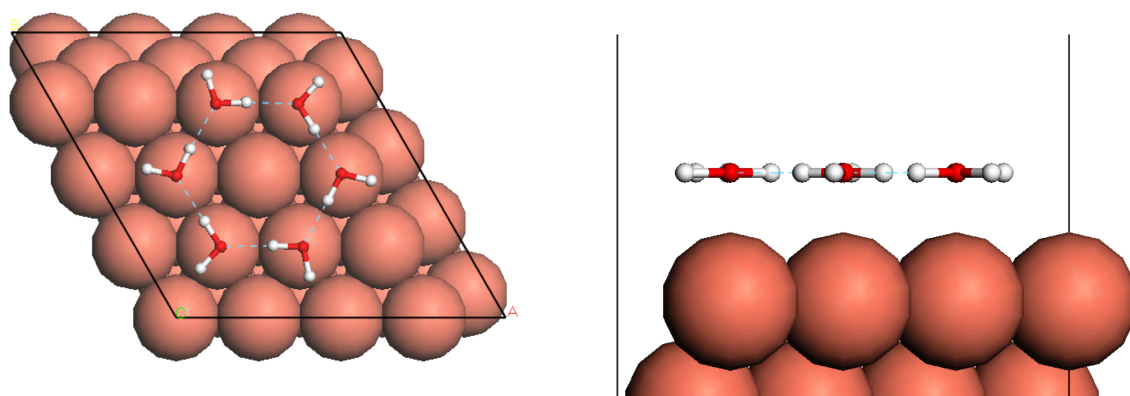

Figure S 9. Atomic geometry of the hexamer (cyclic/planar) adsorption model (left:topview, right:sideview) on Cu(111) surface (Cu atoms shown as bigger red balls). H<sub>2</sub>O molecules are located with the on-top geometry.
